# Supplementary material for: In Vitro Comparative Study of Solid Lipid and PLGA Nanoparticles Designed to Facilitate Nose-to-Brain Delivery of Insulin
Source: MDPI journal article supplement (doi:10.3390/ijms222413258), 2021-12-09
Supplement: s1 [file s1]

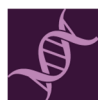

Supplementary material

# In Vitro Comparative Study of Solid Lipid and PLGA Nanoparticles Designed to Facilitate Nose-to-Brain Delivery of Insulin

Hussein Akel <sup>1</sup>, Ildikó Csóka <sup>1</sup>, Rita Ambrus <sup>1</sup>, Alexandra Bocsik <sup>2</sup>, Ilona Gróf <sup>2</sup>, Mária Mészáros <sup>2</sup>, Anikó Szecskó <sup>2</sup>, Gábor Kozma <sup>3</sup>, Szilvia Veszelka <sup>2</sup>, Mária A. Deli <sup>2</sup>, Zoltán Kónya <sup>3</sup> and Gábor Katona <sup>1,\*</sup>

<sup>1</sup> Faculty of Pharmacy, Institute of Pharmaceutical Technology and Regulatory Affairs, University of Szeged, Eötvös str. 6, H-6720 Szeged, Hungary; hussein.akel@szte.hu (H.A.); csoka.ildiko@szte.hu (I.C.); ambrus.rita@szte.hu (R.A.)

<sup>2</sup> Biological Research Centre, Institute of Biophysics, Temesvári Blvd. 62., H-6726 Szeged, Hungary; bocsik.alexandra@brc.hu (A.B.); grof.ilona@brc.hu (I.G.); meszaros.maria@brc.hu (M.M.); szecskoaniko@gmail.com (A.S.); veszelka.szilvia@brc.hu (S.V.); deli.maria@brc.hu (M.A.D.)

<sup>3</sup> Department of Applied & Environmental Chemistry, Faculty of Science and Informatics, Rerrich Béla sq. 1., H-6720 Szeged, Hungary; kozmag@chem.u-szeged.hu (G.K.); konya@chem.u-szeged.hu (Z.K.)

\* Correspondence: katona.gabor@szte.hu; Tel.: +36-62-545-575

## Permeability of Paracellular Marker Molecules on the Barrier Models

To determine the tightness of the nasal epithelial co-culture model two passive permeability marker molecules were tested [88] after the permeability experiment. In the donor compartments 0.5 mL buffer containing fluorescein isothiocyanate (FITC)-labeled dextran (FD10, 100 µg/mL; Mw: 10 kDa) and Evans blue labeled albumin (167.5 µg/mL Evans blue dye and 10 mg/mL bovine serum albumin; MW: 67.5 kDa) was added. The inserts were kept in 12-well plates on a horizontal shaker (120 rpm) for 30 min (Supplementary Figure S1).

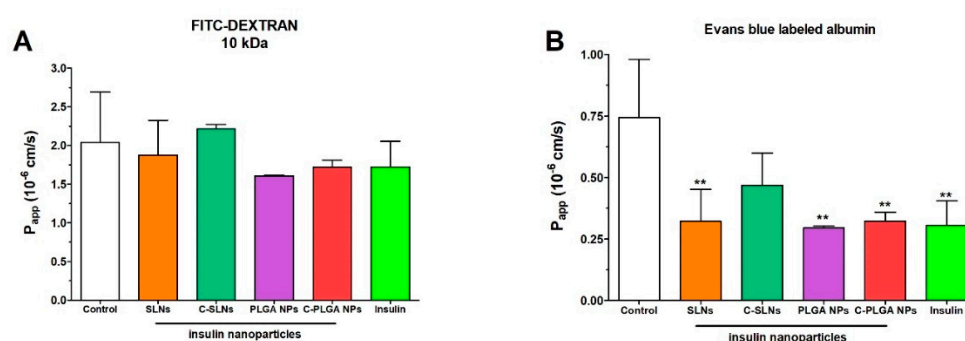

**Figure S1.** Apparent permeability coefficients ( $P_{app}$ ) of passive paracellular permeability markers FITC-Dextran (10 kDa) (**A**) and Evans blue labelled albumin (EBA, 67.5 kDa) (**B**) across RPMI 2650 epithelial cell layers after the 1-hour transport study of insulin. Permeability assay lasted for 30 minutes. Values are presented as means  $\pm$  SD,  $n = 3$ . Statistical analysis: ANOVA followed by Dunett's test. \*\*  $p < 0.01$ , compared to the control group.

In the case of brain endothelial cells paracellular permeability for marker molecules was performed parallelly with insulin transport study for 1 hour (Supplementary Figure S2). The concentrations of the marker molecules in the samples from the compartments were determined by a fluorescence multiwell plate reader (Fluostar Optima, BMG Lab-technologies, Germany; FITC: excitation wavelength: 485 nm, emission wavelength: 520 nm; Evans-blue labeled albumin: excitation wavelength: 584 nm, emission wavelength: 680 nm).

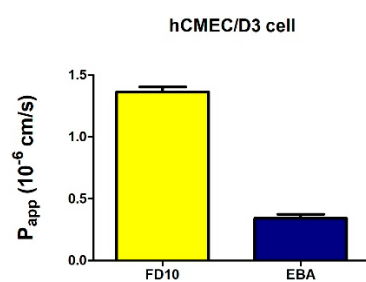

**Figure S2.** Apparent permeability coefficients ( $P_{app}$ ) of passive paracellular permeability markers FITC-Dextran (10 kDa) (**A**) and Evans blue labelled albumin (EBA, 67.5 kDa) (**B**) across D3 endothelial cell layers after the 1-hour transport study of insulin. Permeability assay lasted for 30 minutes. Values are presented as means  $\pm$  SD,  $n = 3$ .
